# Supplementary material
Source: Springer Nature journal article supplement (https://www.springermedizin.de/resource/supplementary/12889_2012_4541_MOESM1_ESM.pdf/9492000)

Subjects with injuries, %

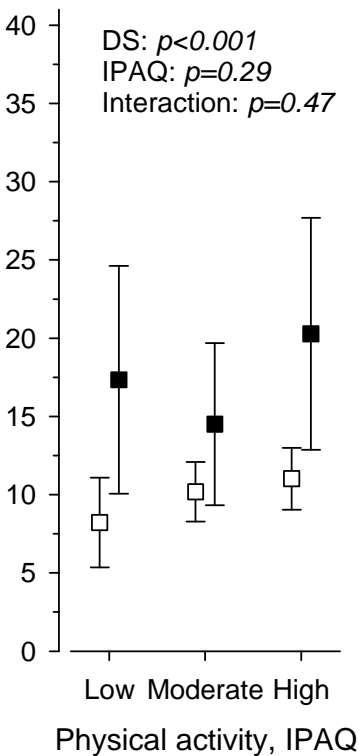

Supplement: MOESM1 [file 9492000]
